# Supplementary material
Source: PubMed Central journal article supplement (PMC7667577)
Supplement: jama-e2022258-s004.pdf [file jama-e2022258-s004.pdf]

## **Data Sharing Statement**

Nicholls. Effect of High-Dose Omega-3 Fatty Acids vs Corn Oil on Major Adverse Cardiovascular Events in Patients at High Cardiovascular Risk. *JAMA*. Published November 15, 2020. 10.1001/jama.2020.22258

### **Data**

**Data available:** No
